# Supplementary material
Source: publisher figshare collection journal article supplement (https://acs.figshare.com/ndownloader/files/23832256)
Supplement: Supplementary file 1 [file 23832256]

## Supporting Information

### Photoactive graphitic carbon nitride-based gel beads as recyclable photocatalysts

Qian Cao,<sup>a</sup> Jesús Barrio,<sup>b</sup> Markus Antonietti,<sup>a</sup> Baris Kumru,<sup>a\*</sup> Menny Shalom,<sup>b\*</sup> Bernhard V. K. J. Schmidt,<sup>a,c\*</sup>

<sup>a</sup> Max Planck Institute of Colloids and Interfaces, Department of Colloid Chemistry, Am Mühlenberg 1, 14476 Potsdam, Germany

<sup>b</sup> Ben-Gurion University of the Negev, Department of Chemistry and Ilse Katz Institute for Nanoscale Science and Technology, Ben-Beer-Sheva 8410501, Israel

<sup>c</sup> School of Chemistry, University of Glasgow, Glasgow G12 8QQ, UK

Email: baris.kumru@mpikg.mpg.de, mennysh@bgu.ac.il, bernhard.schmidt@glasgow.ac.uk

#### Supplementary Experimental Section

##### *Swelling ratio measurement*

The swelling ratios were determined by the weight difference between freeze dried and swollen samples. 40 mg ( $W_d$ ) dried MGB samples were immersed into excessive amount of distilled water at room temperature and weighed after left to stand for 3 h ( $W_s$ ), the excessive surface water was removed by lightly touching the samples with filter paper. The MGB swelling ratios (S) were calculated by the following equation:

$$S = \frac{W_s - W_d}{W_d} \times 100\%$$

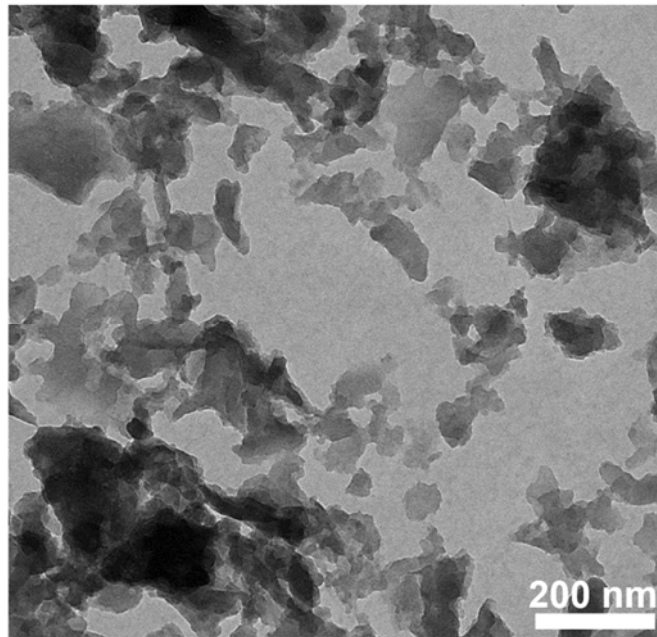

Figure S1. TEM image of CMp.

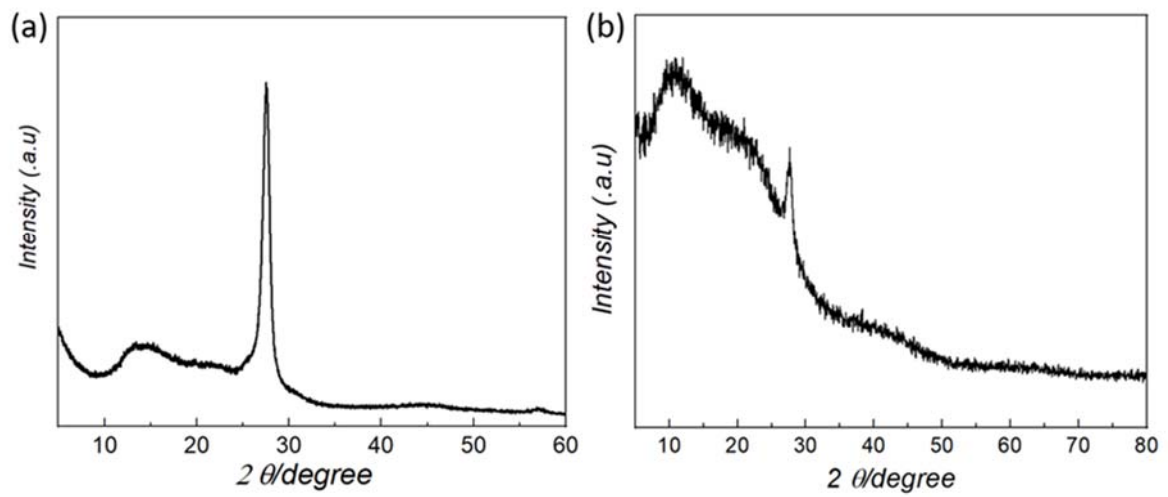

Figure S2. XRD of the pure CMp (a) and PDMA/CMp (b) MGB composites.

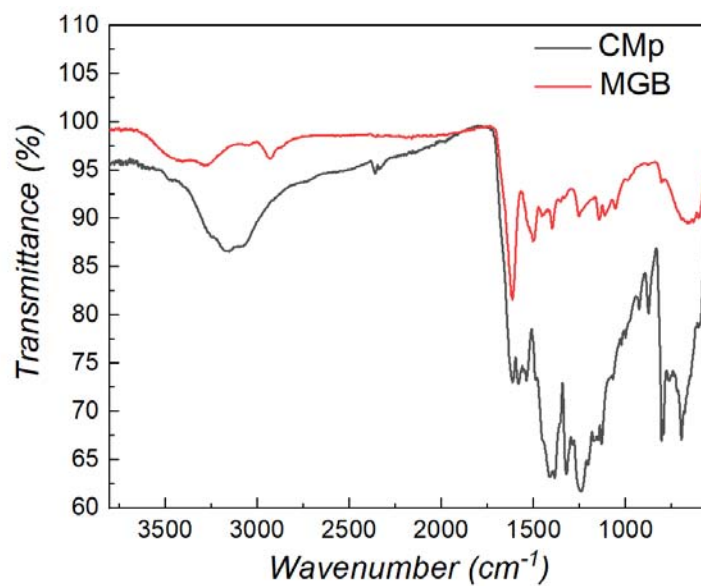

Figure S3. FT-IR of pure CMp and PDMA/CMp-6 MGB.

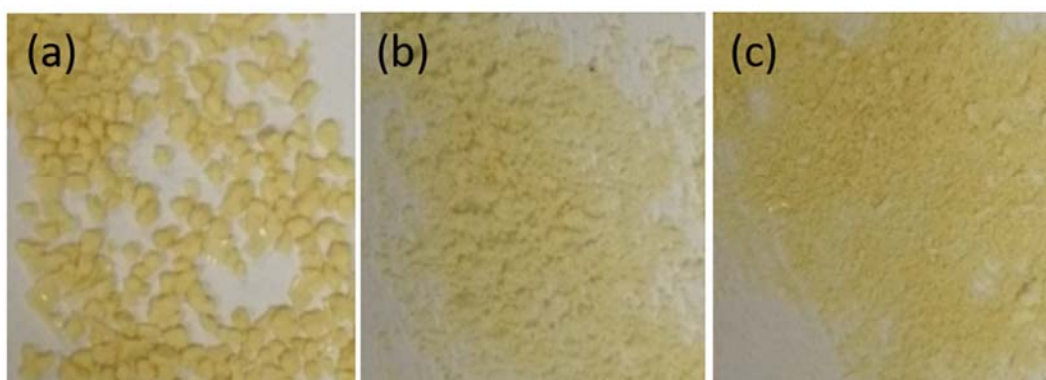

Figure S4. Digital images of PDMA/CMp-1, PDMA/CMp-2, PDMA/CMp-3.

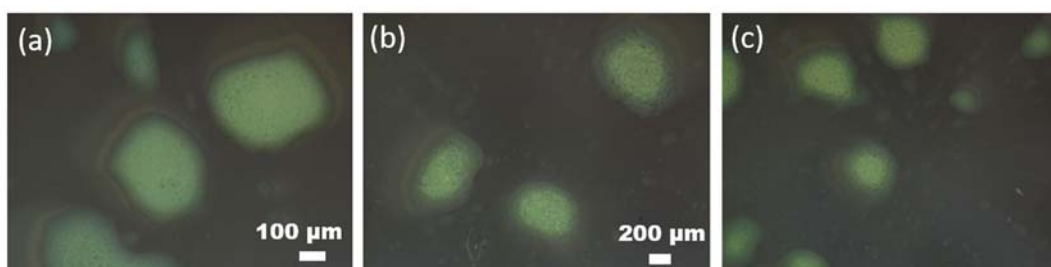

Figure S5. Optical microscopy images of monomer droplets with agitation of 1200 rpm (a), 700 rpm (b) and 300 rpm (c).

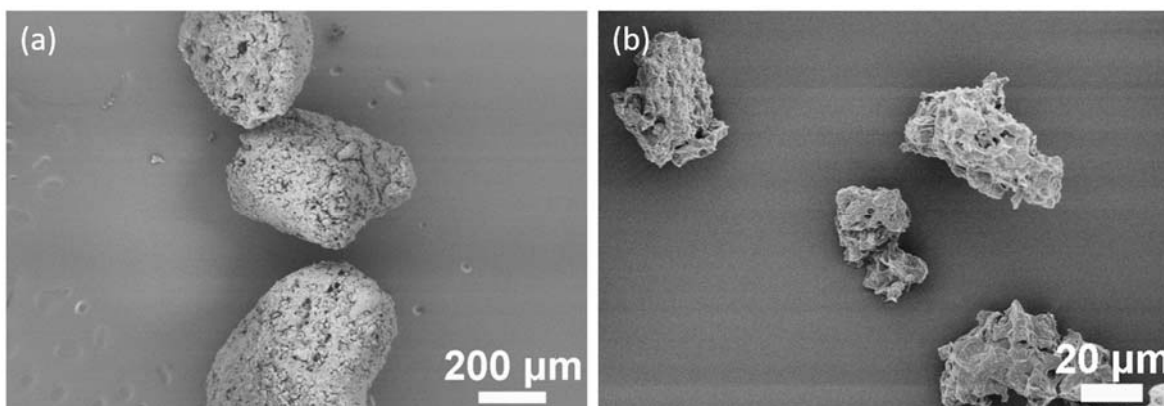

Figure S6. SEM images of PDMA/CMp-7 and PDMA/CMp-8.

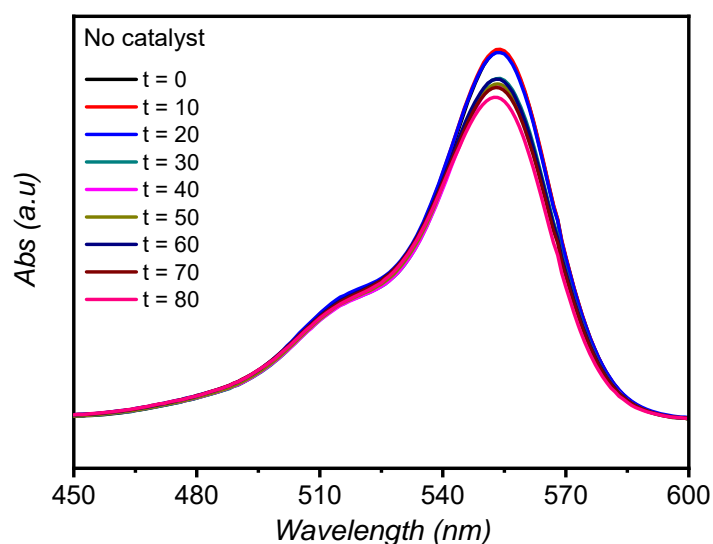

Figure S7. UV-vis absorption spectra of RhB solution (10 minutes interval) during photocatalytic degradation under visible light in the absence of PDMA/CMp MGB samples.

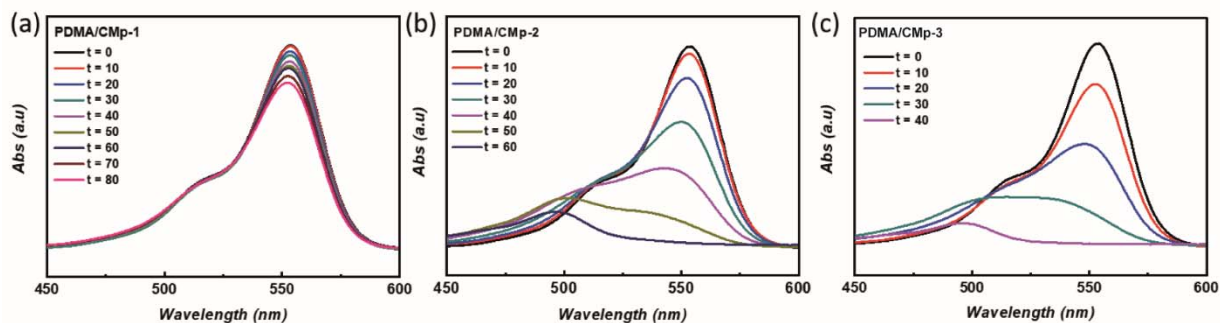

Figure S8. UV-vis absorption spectra of RhB solution (10 minutes interval) during photocatalytic degradation under visible light in the presence of PDMA/CMp-1 (a), PDMA/CMp-2 (b) and PDMA/CMp-3 (c) samples, respectively.

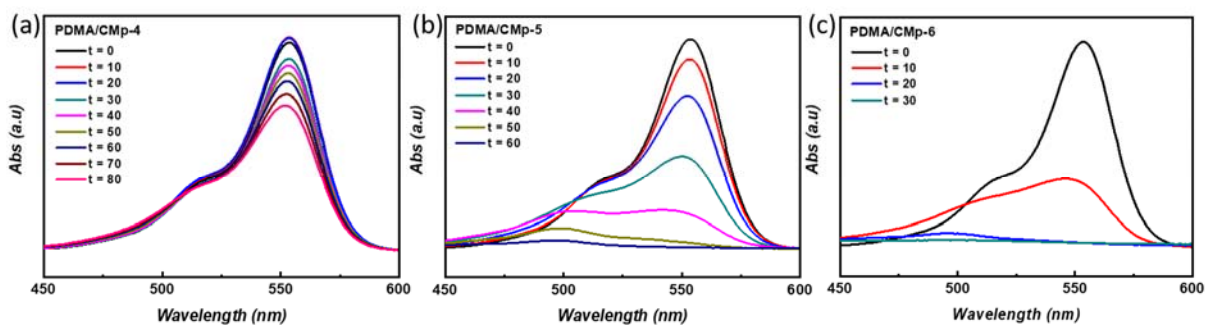

Figure S9. UV-vis absorption spectra of RhB solution (10 minutes interval) during photocatalytic degradation under visible light in the presence of PDMA/CMp-4 (a), PDMA/CMp-5 (b) and PDMA/CMp-6 (c) samples, respectively.

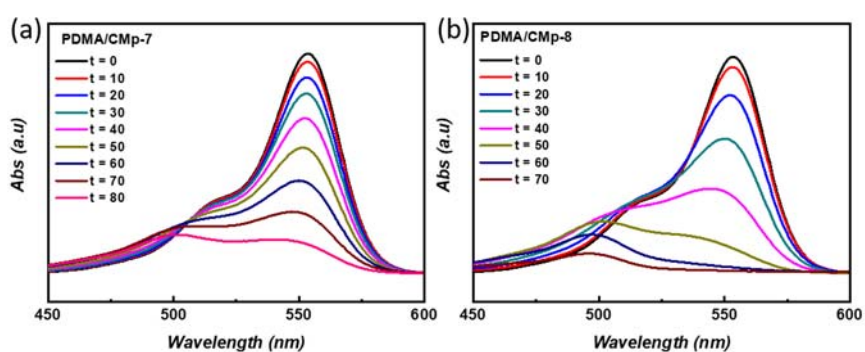

Figure S10. UV-vis absorption spectra of RhB solution (10 minutes interval) during photocatalytic degradation under visible light in the presence of PDMA/CMp-7 (a) and PDMA/CMp-8 (b) samples, respectively.

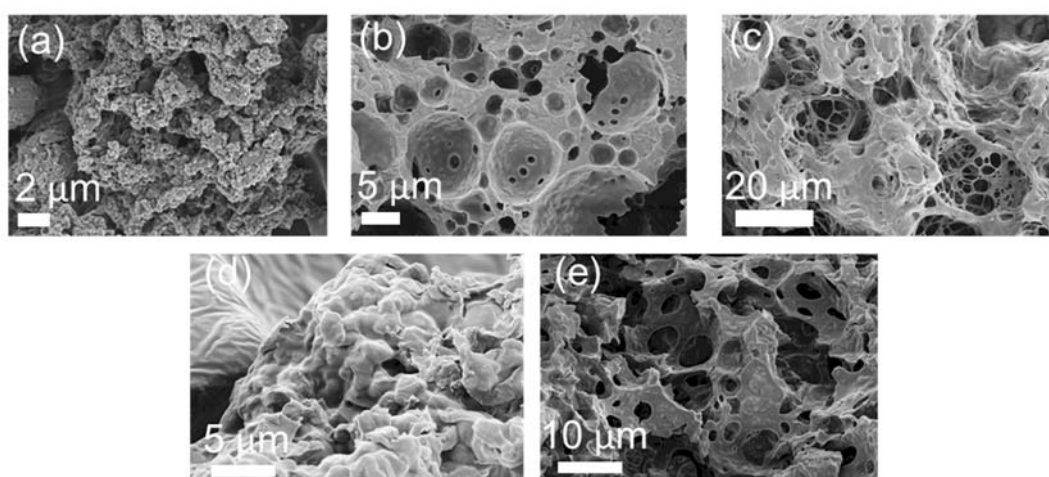

Figure S11. Magnified SEM images of PDMA/CMp-4 (a), PDMA/CMp-5 (b), PDMA/CMp-6 (c), PDMA/CMp-7 (d) and PDMA/CMp-8 (e).

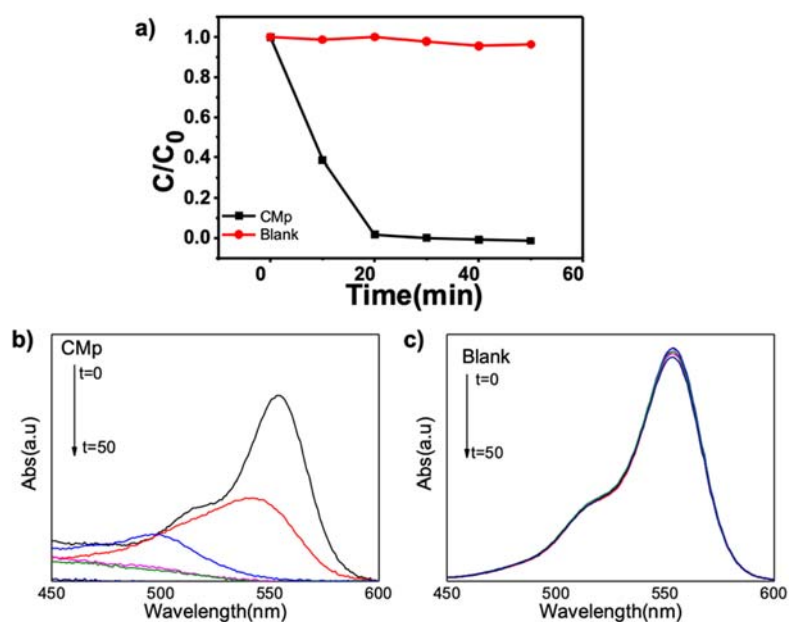

Figure S12. RhB degradation performance ( $10 \text{ mg mL}^{-1}$ ) a) and UV-vis curves (b, c) utilizing Cmp as photocatalyst.

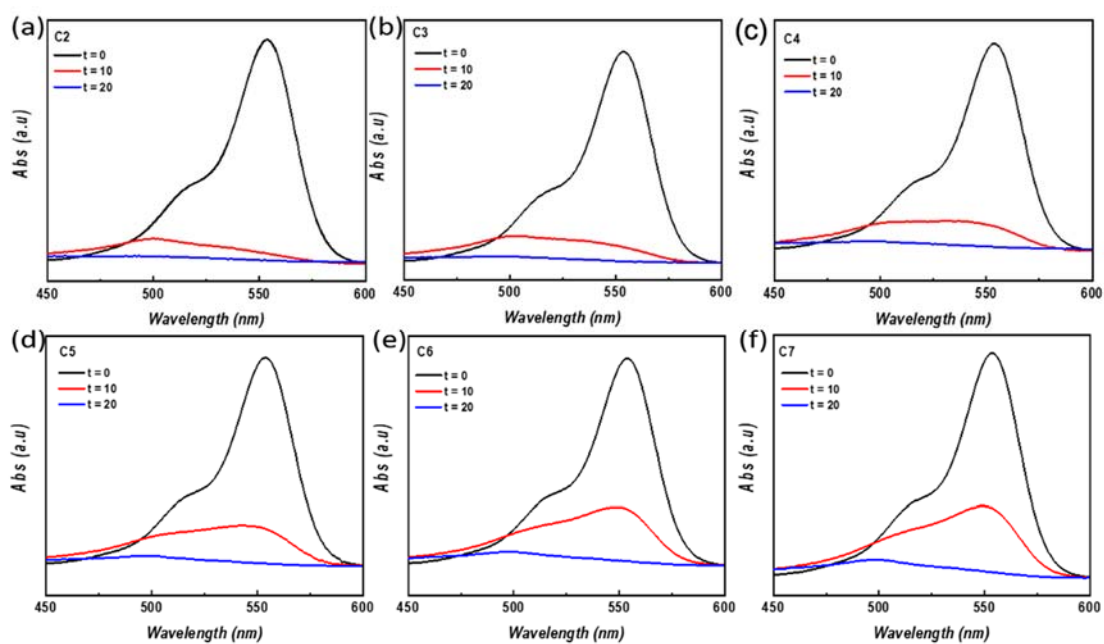

Figure S13. UV-vis absorption spectra of cycling run of RhB in the presence of PDMA/Cmp-6 MGB under visible light irradiation.

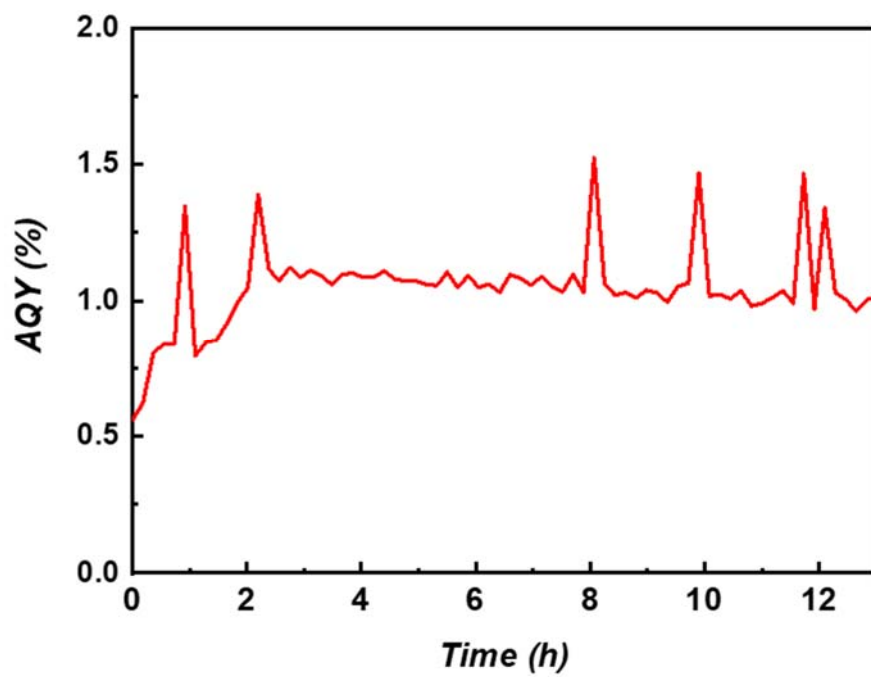

Figure S14. Average quantum yield upon illumination at 405 nm.
